# Supplementary material
Source: publisher site journal article supplement (https://www.dovepress.com/article/238225)
Supplement: Supplementary file 1 [file get_supplementary_file.php]

# Supplementary material: Secular seasonality and trend forecasting of tuberculosis incidence rate in China using the advanced error-trend-seasonal framework

Yongbin Wang1,*, Chunjie Xu2,*, Jingchao Ren1, Weidong Wu1, Xiangmei Zhao1, Ling Chao1, Wenjuan Liang1, Sanqiao Yao1

1 Department of Epidemiology and Health Statistics, School of Public Health, Xinxiang Medical University, Xinxiang, Henan Province, P.R. China; 2 Department of Occupational and Environmental Health, School of Public Health, Capital Medical University, Beijing, P.R. China

Correspondence: Yongbin Wang

Department of Epidemiology and Health Statistics, School of Public Health, Xinxiang Medical University, Xinxiang 453000, Henan Province, P.R. China

Tel +86 0373 383 1646

Email [wybwho@163.com](mailto:wybwho@163.com) (Yongbin Wang)

*These authors contributed equally to this work

**Table S1** Possible ETS specifications and their performance measurements derived from the training data from January 1997 to August 2018

| **Models** | **Compact LL** | **LL** | **AIC** | **BIC** | **HQ** | **AMSE** |
| --- | --- | --- | --- | --- | --- | --- |
| M,MD,A | -590.972 | -237.007 | 1215.944 | 1276.475 | 1240.278 | 0.495 |
| M,A,A | -592.179 | -238.214 | 1216.358 | 1273.329 | 1239.261 | 0.506 |
| M,AD,A | -591.949 | -237.984 | 1217.898 | 1278.429 | 1242.232 | 1.00E+100 |
| M,M,A | -592.986 | -239.022 | 1217.973 | 1274.944 | 1240.876 | 0.549 |
| A,MD,M | -597.698 | -243.733 | 1229.396 | 1289.927 | 1253.730 | 0.456 |
| A,A,M | -598.792 | -244.827 | 1229.584 | 1286.555 | 1252.487 | 0.469 |
| M,N,A | -602.068 | -248.104 | 1232.137 | 1281.986 | 1252.177 | 0.498 |
| A,M,M | -602.141 | -248.176 | 1236.282 | 1293.253 | 1259.185 | 0.495 |
| A,N,A | -609.245 | -255.280 | 1246.490 | 1296.339 | 1266.530 | 0.481 |
| A,MD,A | -606.313 | -252.348 | 1246.626 | 1307.157 | 1270.960 | 0.457 |
| A,AD,A | -606.455 | -252.490 | 1246.909 | 1307.441 | 1271.244 | 1.00E+100 |
| A,AD,M | -606.826 | -252.861 | 1247.652 | 1308.183 | 1271.986 | 1.00E+100 |
| A,A,A | -608.411 | -254.446 | 1248.822 | 1305.793 | 1271.725 | 0.475 |
| A,M,A | -609.190 | -255.226 | 1250.381 | 1307.352 | 1273.284 | 0.481 |
| A,N,M | -612.854 | -258.889 | 1253.708 | 1303.557 | 1273.748 | 0.490 |
| M,MD,M | -612.547 | -258.582 | 1259.093 | 1319.625 | 1283.428 | 0.487 |
| M,A,M | -614.764 | -260.799 | 1261.528 | 1318.498 | 1284.431 | 0.516 |
| M,AD,M | -613.911 | -259.946 | 1261.822 | 1322.354 | 1286.157 | 1.00E+100 |
| M,M,M | -615.427 | -261.462 | 1262.854 | 1319.825 | 1285.757 | 0.558 |
| M,N,M | -630.667 | -276.702 | 1289.334 | 1339.183 | 1309.374 | 0.522 |
| A,N,N | -723.387 | -369.422 | 1450.773 | 1457.894 | 1453.636 | 1.454 |
| A,A,N | -723.262 | -369.297 | 1454.523 | 1468.766 | 1460.249 | 1.451 |
| A,M,N | -723.272 | -369.308 | 1454.544 | 1468.787 | 1460.270 | 1.453 |
| A,MD,N | -722.577 | -368.612 | 1455.153 | 1472.957 | 1462.310 | 1.445 |
| A,AD,N | -722.606 | -368.641 | 1455.211 | 1473.015 | 1462.368 | 1.00E+100 |
| M,AD,N | -742.680 | -388.715 | 1495.360 | 1513.163 | 1502.517 | 1.400 |
| M,A,N | -744.045 | -390.080 | 1496.090 | 1510.332 | 1501.815 | 1.414 |
| M,MD,N | -746.016 | -392.052 | 1502.033 | 1519.836 | 1509.190 | 1.374 |
| M,M,N | -747.419 | -393.455 | 1502.838 | 1517.081 | 1508.564 | 1.475 |
| M,N,N | -750.318 | -396.353 | 1504.635 | 1511.756 | 1507.498 | 1.377 |

**Abbreviation:** ETS, error-trend-seasonal; LL, Likelihood; AIC, Akaike information criterion, BIC, Bayesian information criterion; HQ, Hannan-Quinn criterion; AMSE, average mean square error.

**Table S2** Initial parameters for the best-undertaking ETS(M,MD,A) framework

| **Parameters** | **Values** |
| --- | --- |
| Initial level | 2.367 |
| Initial trend | 1.014 |
| Initial state 1 | -0.151 |
| Initial state 2 | -0.206 |
| Initial state 3 | -0.090 |
| Initial state 4 | 0.079 |
| Initial state 5 | 0.370 |
| Initial state 6 | 0.514 |
| Initial state 7 | 0.525 |
| Initial state 8 | 0.503 |
| Initial state 9 | 0.475 |
| Initial state 10 | 0.157 |
| Initial state 11 | -0.883 |
| Initial state 12 | -1.293 |

**Abbreviation:** ETS, error-trend-seasonal.

**Table S3** Possible ETS specifications and their performance measurements derived from the training data from January 1997 to August 2017

| **Models** | **Compact LL** | **LL** | **AIC*** | **BIC** | **HQ** | **AMSE** |
| --- | --- | --- | --- | --- | --- | --- |
| M,MD,A | -559.392 | -227.623 | 1152.783 | 1212.512 | 1176.828 | 0.518 |
| M,A,A | -560.472 | -228.703 | 1152.944 | 1209.159 | 1175.574 | 0.527 |
| M,M,A | -561.264 | -229.496 | 1154.528 | 1210.743 | 1177.158 | 0.573 |
| M,AD,A | -560.278 | -228.509 | 1154.555 | 1214.283 | 1178.599 | 1.00E+100 |
| A,MD,M | -565.145 | -233.377 | 1164.290 | 1224.018 | 1188.335 | 0.458 |
| A,A,M | -566.327 | -234.559 | 1164.655 | 1220.870 | 1187.285 | 0.474 |
| M,N,A | -569.913 | -238.145 | 1167.827 | 1217.015 | 1187.628 | 0.517 |
| A,M,M | -569.521 | -237.752 | 1171.041 | 1227.256 | 1193.671 | 0.500 |
| A,N,A | -578.563 | -246.794 | 1185.125 | 1234.313 | 1204.927 | 0.497 |
| A,MD,A | -576.100 | -244.331 | 1186.199 | 1245.927 | 1210.244 | 0.474 |
| A,AD,A | -576.213 | -244.445 | 1186.426 | 1246.154 | 1210.470 | 1.00E+100 |
| A,A,A | -577.882 | -246.113 | 1187.764 | 1243.979 | 1210.394 | 0.492 |
| A,AD,M | -576.891 | -245.122 | 1187.782 | 1247.510 | 1211.826 | 1.00E+100 |
| A,M,A | -578.484 | -246.716 | 1188.969 | 1245.184 | 1211.599 | 0.496 |
| A,N,M | -582.559 | -250.791 | 1193.119 | 1242.307 | 1212.920 | 0.507 |
| M,MD,M | -581.217 | -249.448 | 1196.434 | 1256.162 | 1220.478 | 0.504 |
| M,A,M | -583.340 | -251.572 | 1198.680 | 1254.895 | 1221.310 | 0.534 |
| M,AD,M | -582.520 | -250.751 | 1199.039 | 1258.768 | 1223.084 | 1.00E+100 |
| M,M,M | -583.997 | -252.229 | 1199.994 | 1256.209 | 1222.624 | 0.578 |
| M,N,M | -598.541 | -266.772 | 1225.082 | 1274.270 | 1244.883 | 0.542 |
| A,N,N | -686.415 | -354.647 | 1376.830 | 1383.857 | 1379.659 | 1.499 |
| A,A,N | -686.274 | -354.506 | 1380.549 | 1394.602 | 1386.206 | 1.495 |
| A,M,N | -686.311 | -354.543 | 1380.623 | 1394.676 | 1386.280 | 1.497 |
| A,MD,N | -685.649 | -353.881 | 1381.299 | 1398.866 | 1388.371 | 1.488 |
| A,AD,N | -685.676 | -353.907 | 1381.352 | 1398.919 | 1388.424 | 1.00E+100 |
| M,AD,N | -704.996 | -373.227 | 1419.992 | 1437.559 | 1427.063 | 1.449 |
| M,A,N | -706.394 | -374.626 | 1420.789 | 1434.842 | 1426.446 | 1.470 |
| M,MD,N | -708.529 | -376.761 | 1427.059 | 1444.626 | 1434.131 | 1.416 |
| M,M,N | -709.937 | -378.169 | 1427.874 | 1441.928 | 1433.531 | 1.524 |
| M,N,N | -712.376 | -380.608 | 1428.753 | 1435.780 | 1431.581 | 1.420 |

**Abbreviation:** ETS, error-trend-seasonal; LL, Likelihood; AIC, Akaike information criterion, BIC, Bayesian information criterion; HQ, Hannan-Quinn criterion; AMSE, average mean square error.

**Table S4** Initial parameters for the best-undertaking ETS(M,MD,A) framework

| **Parameters** | **Values** |
| --- | --- |
| Initial level | 2.374 |
| Initial trend | 1.014 |
| Initial state 1 | -0.151 |
| Initial state 2 | -0.212 |
| Initial state 3 | -0.102 |
| Initial state 4 | 0.072 |
| Initial state 5 | 0.365 |
| Initial state 6 | 0.516 |
| Initial state 7 | 0.536 |
| Initial state 8 | 0.504 |
| Initial state 9 | 0.494 |
| Initial state 10 | 0.169 |
| Initial state 11 | -0.888 |
| Initial state 12 | -1.303 |

**Abbreviation:** ETS, error-trend-seasonal.

**Table S5** Possible ETS specifications and their performance measurements derived from the training data from January 1997 to August 2016

| **Models** | **Compact LL** | **LL** | **AIC** | **BIC** | **HQ** | **AMSE** |
| --- | --- | --- | --- | --- | --- | --- |
| M,A,A | -528.885 | -219.022 | 1089.770 | 1145.191 | 1112.110 | 0.540 |
| M,MD,A | -527.901 | -218.039 | 1089.803 | 1148.688 | 1113.540 | 0.532 |
| M,M,A | -529.655 | -219.792 | 1091.309 | 1146.731 | 1113.650 | 0.587 |
| M,AD,A | -528.709 | -218.846 | 1091.417 | 1150.302 | 1115.154 | 1.00E+100 |
| A,MD,M | -533.641 | -223.778 | 1101.282 | 1160.167 | 1125.019 | 0.469 |
| A,A,M | -534.727 | -224.864 | 1101.454 | 1156.875 | 1123.795 | 0.483 |
| M,N,A | -538.482 | -228.619 | 1104.964 | 1153.457 | 1124.512 | 0.528 |
| A,M,M | -537.743 | -227.881 | 1107.487 | 1162.908 | 1129.828 | 0.509 |
| A,N,A | -547.310 | -237.447 | 1122.620 | 1171.113 | 1142.168 | 0.510 |
| A,MD,A | -545.146 | -235.284 | 1124.293 | 1183.178 | 1148.030 | 0.492 |
| A,AD,A | -545.206 | -235.343 | 1124.412 | 1183.297 | 1148.149 | 1.00E+100 |
| A,A,A | -546.566 | -236.704 | 1125.133 | 1180.554 | 1147.474 | 0.504 |
| A,M,A | -547.247 | -237.384 | 1126.494 | 1181.915 | 1148.835 | 0.509 |
| A,AD,M | -546.864 | -237.001 | 1127.727 | 1186.612 | 1151.464 | 1.00E+100 |
| A,N,M | -552.193 | -242.330 | 1132.386 | 1180.880 | 1151.934 | 0.526 |
| M,MD,M | -550.039 | -240.176 | 1134.077 | 1192.962 | 1157.814 | 0.523 |
| M,A,M | -551.996 | -242.133 | 1135.992 | 1191.413 | 1158.333 | 0.554 |
| M,AD,M | -551.236 | -241.373 | 1136.471 | 1195.357 | 1160.209 | 1.00E+100 |
| M,M,M | -552.665 | -242.802 | 1137.329 | 1192.750 | 1159.670 | 0.600 |
| M,N,M | -566.452 | -256.589 | 1160.903 | 1209.397 | 1180.451 | 0.563 |
| A,N,N | -651.826 | -341.963 | 1307.651 | 1314.579 | 1310.444 | 1.559 |
| A,A,N | -651.695 | -341.833 | 1311.391 | 1325.246 | 1316.976 | 1.555 |
| A,M,N | -651.714 | -341.852 | 1311.429 | 1325.284 | 1317.014 | 1.557 |
| A,MD,N | -651.090 | -341.227 | 1312.180 | 1329.499 | 1319.162 | 1.547 |
| A,AD,N | -651.115 | -341.253 | 1312.231 | 1329.550 | 1319.212 | 1.00E+100 |
| M,AD,N | -668.696 | -358.833 | 1347.391 | 1364.710 | 1354.373 | 1.500 |
| M,A,N | -670.017 | -360.154 | 1348.033 | 1361.889 | 1353.618 | 1.520 |
| M,MD,N | -671.853 | -361.990 | 1353.706 | 1371.025 | 1360.688 | 1.467 |
| M,M,N | -673.450 | -363.587 | 1354.900 | 1368.756 | 1360.485 | 1.582 |
| M,N,N | -675.486 | -365.623 | 1354.972 | 1361.899 | 1357.764 | 1.473 |

**Abbreviation:** ETS, error-trend-seasonal; LL, Likelihood; AIC, Akaike information criterion, BIC, Bayesian information criterion; HQ, Hannan-Quinn criterion; AMSE, average mean square error.

**Table S6** Initial parameters for the best-undertaking ETS(M,A,A) framework

| **Parameters** | **Values** |
| --- | --- |
| Initial level | 2.399 |
| Initial trend | 0.025 |
| Initial state 1 | -0.151 |
| Initial state 2 | -0.211 |
| Initial state 3 | -0.102 |
| Initial state 4 | 0.074 |
| Initial state 5 | 0.370 |
| Initial state 6 | 0.521 |
| Initial state 7 | 0.542 |
| Initial state 8 | 0.509 |
| Initial state 9 | 0.497 |
| Initial state 10 | 0.166 |
| Initial state 11 | -0.895 |
| Initial state 12 | -1.318 |

**Abbreviation:** ETS, error-trend-seasonal.

**Table S7** Possible ETS specifications and their performance measurements derived from the training data from January 1997 to August 2015

| **Models** | **Compact LL** | **LL** | **AIC** | **BIC** | **HQ** | **AMSE** |
| --- | --- | --- | --- | --- | --- | --- |
| M,A,A | -498.979 | -210.717 | 1029.957 | 1084.544 | 1051.991 | 0.562 |
| M,MD,A | -498.024 | -209.761 | 1030.047 | 1088.045 | 1053.458 | 0.553 |
| M,M,A | -499.747 | -211.485 | 1031.494 | 1086.081 | 1053.528 | 0.610 |
| M,AD,A | -498.794 | -210.531 | 1031.587 | 1089.585 | 1054.998 | 1.00E+100 |
| A,MD,M | -503.862 | -215.600 | 1041.724 | 1099.722 | 1065.135 | 0.477 |
| A,A,M | -505.116 | -216.854 | 1042.233 | 1096.819 | 1064.266 | 0.495 |
| A,AD,M | -504.659 | -216.397 | 1043.318 | 1101.316 | 1066.729 | 1.00E+100 |
| M,N,A | -508.310 | -220.048 | 1044.620 | 1092.383 | 1063.899 | 0.551 |
| A,M,M | -507.995 | -219.732 | 1047.989 | 1102.575 | 1070.023 | 0.522 |
| A,N,A | -518.039 | -229.776 | 1064.077 | 1111.840 | 1083.357 | 0.529 |
| A,MD,A | -515.887 | -227.625 | 1065.774 | 1123.772 | 1089.185 | 0.510 |
| A,AD,A | -515.947 | -227.685 | 1065.895 | 1123.893 | 1089.306 | 1.00E+100 |
| A,A,A | -517.309 | -229.047 | 1066.619 | 1121.205 | 1088.652 | 0.523 |
| A,M,A | -517.942 | -229.680 | 1067.885 | 1122.471 | 1089.919 | 0.528 |
| M,MD,M | -519.655 | -231.393 | 1073.310 | 1131.308 | 1096.721 | 0.545 |
| A,N,M | -523.125 | -234.863 | 1074.250 | 1122.013 | 1093.529 | 0.548 |
| M,A,M | -521.568 | -233.306 | 1075.137 | 1129.723 | 1097.171 | 0.579 |
| M,AD,M | -520.790 | -232.528 | 1075.580 | 1133.578 | 1098.991 | 1.00E+100 |
| M,M,M | -522.222 | -233.960 | 1076.445 | 1131.031 | 1098.478 | 0.626 |
| M,N,M | -535.210 | -246.948 | 1098.421 | 1146.184 | 1117.700 | 0.590 |
| A,N,N | -615.989 | -327.727 | 1235.979 | 1242.802 | 1238.733 | 1.606 |
| A,A,N | -615.846 | -327.584 | 1239.692 | 1253.339 | 1245.200 | 1.601 |
| A,M,N | -615.891 | -327.629 | 1239.782 | 1253.429 | 1245.291 | 1.605 |
| A,MD,N | -615.280 | -327.018 | 1240.560 | 1257.618 | 1247.445 | 1.594 |
| A,AD,N* | -615.304 | -327.042 | 1240.608 | 1257.666 | 1247.494 | 1.00E+100 |
| M,AD,N | -631.190 | -342.928 | 1272.380 | 1289.438 | 1279.265 | 1.546 |
| M,A,N | -632.403 | -344.141 | 1272.806 | 1286.453 | 1278.314 | 1.567 |
| M,MD,N | -634.358 | -346.096 | 1278.717 | 1295.775 | 1285.602 | 1.512 |
| M,N,N | -637.587 | -349.325 | 1279.174 | 1285.998 | 1281.929 | 1.521 |
| M,M,N | -635.983 | -347.721 | 1279.966 | 1293.613 | 1285.475 | 1.636 |

**Abbreviation:** ETS, error-trend-seasonal; LL, Likelihood; AIC, Akaike information criterion, BIC, Bayesian information criterion; HQ, Hannan-Quinn criterion; AMSE, average mean square error.

**Table S8** Initial parameters for the best-undertaking ETS(M,A,A) framework

| **Parameters** | **Values** |
| --- | --- |
| Initial level | 2.399 |
| Initial trend | 0.026 |
| Initial state 1 | -0.151 |
| Initial state 2 | -0.212 |
| Initial state 3 | -0.103 |
| Initial state 4 | 0.073 |
| Initial state 5 | 0.369 |
| Initial state 6 | 0.522 |
| Initial state 7 | 0.544 |
| Initial state 8 | 0.508 |
| Initial state 9 | 0.500 |
| Initial state 10 | 0.167 |
| Initial state 11 | -0.898 |
| Initial state 12 | -1.319 |

**Abbreviation:** ETS, error-trend-seasonal.

**Table S9** Possible ETS specifications and their performance measurements derived from the training data from January 1997 to August 2013

| **Models** | **Compact LL** | **LL** | **AIC** | **BIC** | **HQ** | **AMSE** |
| --- | --- | --- | --- | --- | --- | --- |
| M,MD,A | -434.865 | -188.821 | 903.730 | 959.801 | 926.421 | 0.594 |
| A,MD,M | -442.117 | -196.073 | 918.234 | 974.305 | 940.925 | 0.463 |
| A,MD,A | -455.812 | -209.768 | 945.624 | 1001.700 | 968.316 | 0.546 |
| M,MD,M | -455.861 | -209.817 | 945.722 | 1001.790 | 968.413 | 0.577 |
| A,MD,N | -543.518 | -297.474 | 1097.040 | 1113.530 | 1103.710 | 1.707 |
| M,MD,N | -552.205 | -306.161 | 1114.410 | 1130.900 | 1121.080 | 1.625 |

**Abbreviation:** ETS, error-trend-seasonal; LL, Likelihood; AIC, Akaike information criterion, BIC, Bayesian information criterion; HQ, Hannan-Quinn criterion; AMSE, average mean square error.

**Table S10** Initial parameters for the best-undertaking ETS(M,MD,A) framework

| **Parameters** | **Values** |
| --- | --- |
| Initial level | 2.367 |
| Initial trend | 1.014 |
| Initial state 1 | -0.151 |
| Initial state 2 | -0.211 |
| Initial state 3 | -0.100 |
| Initial state 4 | 0.075 |
| Initial state 5 | 0.369 |
| Initial state 6 | 0.518 |
| Initial state 7 | 0.537 |
| Initial state 8 | 0.500 |
| Initial state 9 | 0.492 |
| Initial state 10 | 0.167 |
| Initial state 11 | -0.896 |
| Initial state 12 | -1.302 |

**Abbreviation:** ETS, error-trend-seasonal.

**Table S11** Possible ETS specifications and their performance measurements derived from the training data from January 1997 to August 2011

| **Models** | **Compact LL** | **LL** | **AIC** | **BIC** | **HQ** | **AMSE** |
| --- | --- | --- | --- | --- | --- | --- |
| M,MD,A | -365.918 | -160.649 | 765.836 | 819.734 | 787.697 | 0.605 |
| A,MD,M | -372.647 | -167.378 | 779.294 | 833.192 | 801.155 | 0.480 |
| M,MD,M | -385.430 | -180.161 | 804.861 | 858.759 | 826.722 | 0.594 |
| A,MD,A | -389.946 | -184.676 | 813.891 | 867.789 | 835.752 | 0.556 |
| A,MD,N | -469.429 | -264.159 | 948.857 | 964.710 | 955.287 | 1.765 |
| M,MD,N | -472.786 | -267.516 | 955.571 | 971.424 | 962.001 | 1.680 |

**Abbreviation:** ETS, error-trend-seasonal; LL, Likelihood; AIC, Akaike information criterion, BIC, Bayesian information criterion; HQ, Hannan-Quinn criterion; AMSE, average mean square error.

**Table S12** Initial parameters for the best-undertaking ETS(M,MD,A) framework

| **Parameters** | **Values** |
| --- | --- |
| Initial level | 2.364 |
| Initial trend | 1.014 |
| Initial state 1 | -0.149 |
| Initial state 2 | -0.211 |
| Initial state 3 | -0.092 |
| Initial state 4 | 0.082 |
| Initial state 5 | 0.373 |
| Initial state 6 | 0.519 |
| Initial state 7 | 0.534 |
| Initial state 8 | 0.499 |
| Initial state 9 | 0.482 |
| Initial state 10 | 0.159 |
| Initial state 11 | -0.899 |
| Initial state 12 | -1.297 |

**Abbreviation:** ETS, error-trend-seasonal.

**Table S13** Possible ETS specifications and their performance measurements derived from the training data from January 1997 to August 2010

| **Models** | **Compact LL** | **LL** | **AIC** | **BIC** | **HQ** | **AMSE** |
| --- | --- | --- | --- | --- | --- | --- |
| M,MD,A | -334.855 | -149.372 | 703.711 | 756.409 | 725.104 | 0.633 |
| A,MD,M | -342.934 | -157.451 | 719.868 | 772.566 | 741.261 | 0.445 |
| M,MD,M | -344.057 | -158.574 | 722.115 | 774.813 | 743.508 | 0.627 |
| A,MD,A | -361.540 | -176.057 | 757.080 | 809.778 | 778.474 | 0.581 |
| M,MD,N | -433.237 | -247.753 | 876.473 | 891.972 | 882.765 | 1.714 |
| A,MD,N | -433.341 | -247.858 | 876.682 | 892.181 | 882.974 | 1.796 |

**Abbreviation:** ETS, error-trend-seasonal; LL, Likelihood; AIC, Akaike information criterion, BIC, Bayesian information criterion; HQ, Hannan-Quinn criterion; AMSE, average mean square error.

**Table S14** Initial parameters for the best-undertaking ETS(M,MD,A) framework

| **Parameters** | **Values** |
| --- | --- |
| Initial level | 2.361 |
| Initial trend | 1.013 |
| Initial state 1 | -0.148 |
| Initial state 2 | -0.211 |
| Initial state 3 | -0.088 |
| Initial state 4 | 0.084 |
| Initial state 5 | 0.375 |
| Initial state 6 | 0.521 |
| Initial state 7 | 0.532 |
| Initial state 8 | 0.497 |
| Initial state 9 | 0.477 |
| Initial state 10 | 0.155 |
| Initial state 11 | -0.899 |
| Initial state 12 | -1.295 |

**Abbreviation:** ETS, error-trend-seasonal.

**Table S15** Initial parameters for the best-undertaking ETS(A,MD,M) framework

| **Parameters** | **Values** |
| --- | --- |
| Initial level | 1.740 |
| Initial trend | 1.090 |
| Initial state 1 | 0.944 |
| Initial state 2 | 0.925 |
| Initial state 3 | 0.878 |
| Initial state 4 | 0.974 |
| Initial state 5 | 1.047 |
| Initial state 6 | 1.081 |
| Initial state 7 | 1.122 |
| Initial state 8 | 1.127 |
| Initial state 9 | 1.220 |
| Initial state 10 | 1.163 |
| Initial state 11 | 0.758 |
| Initial state 12 | 0.762 |

**Abbreviation:** ETS, error-trend-seasonal.


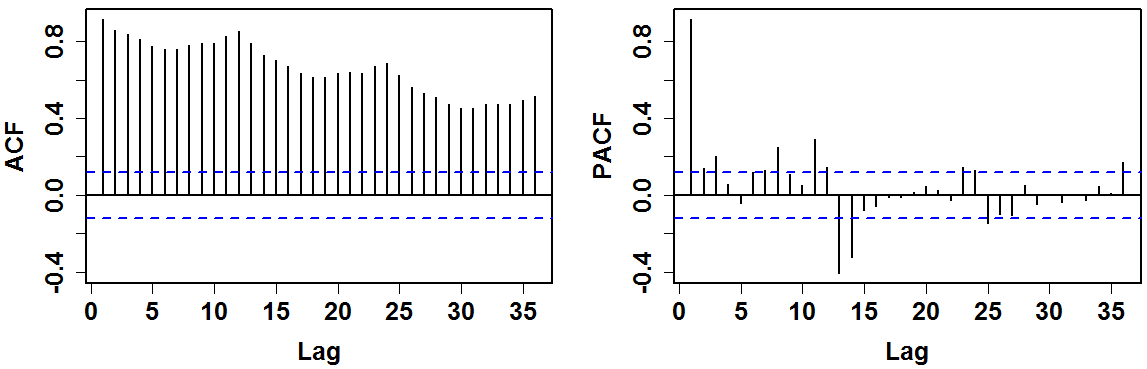


**Figure S1** Autocorrelation (ACF) and partial autocorrelation (PACF) functions plots of the whole data. These plots exhibited that the TB morbidity had a strong seasonal behavior. Thus, it is required to make preprocessing with a seasonally differenced method.

**Figure S2** Time series plots measuring the original TB incidence series and the transformed series with logarithm and square root. (A) The original TB incidence series; (B) the log-transformed series; (C ) the series with the square root transformation.

**Figure S3** Square root transformed TB incidence series from January 1997 to August 2018 after performing a seasonally differenced method and its autocorrelation (ACF) and partial autocorrelation (PACF) functions plots. (A) The square root transformed TB incidence series after a seasonal difference; (B) ACF plot; (C) PACF plot. These plots intimated that a non-seasonal difference was still needed for this series owing to its non-stationarity. Besides, there was a spike at lag 12 in the ACF plot, hence it should appear that a SMA(1) model can be tried in the seasonal part of the SARIMA model.

**Figure S4** Square root transformed TB incidence series from January 1997 to August 2018 after a seasonal and non- seasonal differences and its autocorrelation (ACF) and partial autocorrelation (PACF) functions plots. (A) The square root transformed TB incidence series after conducting differences; (B) ACF plot; (C) PACF plot. These plots implied a stationary series, and it seemed that a sparse coefficient SARIMA model should be considered due to the local-maximum values at lags 11, 12 and 13.

**Figure S5** Statistical tests for the residuals from the SARIMA(0,1,(1,10))(0,1,1)12 approach developed with the training data from January 1997 to August 2017. (A) Autocorrelation function (ACF); (B) partial autocorrelation function (PACF); (C) *P* values for Ljung-Box statistic. Few of correlation coefficients out of the 95% confidence intervals and all *P* values more than 0.05 meant its suitability of this model for the application in this series.

**Figure S6** Checking for the residuals from the SARIMA(0,1,1)(1,1,1)12 method established with the training data from January 1997 to August 2016. (A) Autocorrelation function (ACF); (B) Partial autocorrelation function (PACF); (C) *P* values for Ljung-Box statistic. There were few correlated coefficients in the ACF and PACF plots, coupled with *P*>0.05 at varying lags, showing that this identified approach is suited to model the data.

**Figure S7** Diagnostic summaries for the residuals from the SARIMA(0,1,1)(1,1,1)12 method established with the training data between January 1997 and August 2015. (A) Autocorrelation function (ACF); (B) partial autocorrelation function (PACF); (C) Ljung-Box *P* values. Most of the correlations were within the 95% uncertainty limits and all *P* values were greater than 0.05, being suggestive of its adequacy of this method for extracting the dependent structures behind the data.

**Figure S8** Diagnostic summaries for the residuals from the SARIMA(0,1,1)(0,1,1)12 method established with the training data between January 1997 and August 2013. (A) Autocorrelation function (ACF); (B) partial autocorrelation function (PACF); (C) Ljung-Box *P* values. Almost all correlation coefficients failed to be beyond the estimated 95% uncertainty levels and all Ljung-Box *P* values were insignificant, suggesting that this model is appropriate for fitting the data.

**Figure S9** Diagnostic summaries for the residuals from the SARIMA(0,1,1)(0,1,1)12 method built with the training data between January 1997 and August 2011. (A) Autocorrelation function (ACF); (B) partial autocorrelation function (PACF); (C) Ljung-Box *P* values. As depicted, no series correlation was found in the errors (*P*>0.05), thereby this approach is suitable for analyzing the data.

**Figure S10** Goodness of fit tests for the residuals from the SARIMA(0,1,1)(0,1,1)12 method built with the training data between January 1997 and August 2010. (A) Autocorrelation function (ACF); (B) partial autocorrelation function (PACF); (C) Ljung-Box *P* values. As shown, there was no series correlation in the residuals (*P*>0.05), so this method gives a sufficient model to the data.

**Figure S11** Goodness of fit tests for the residuals from the SARIMA(0,1,1)(0,1,1)12 method built with the training data between January 1997 and August 2008 (A) Autocorrelation function (ACF); (B) partial autocorrelation function (PACF); (C) Ljung-Box *P* values. Based on above plots, we conformed that a suitable model has been identified for the data.
